# Supplementary material
Source: publisher figshare collection journal article supplement (https://acs.figshare.com/ndownloader/files/4083376)
Supplement: Supplementary file 1 [file 4083376]

## Sheet: Raw Data
S1. Percent Inhibition data of compound 16 and experimental details
Compound Number	Compound Concentration(s)	Assay Type	Percent Inhibition	Assay Name	Reference Ki	Reference Compound	Radioligand
16	1.0E-05	NEUROTRANSMITTER RELATED	14.60%	Adenosine, Non-selective	8.17E-9	Neca	[3H]NECA
16	1.0E-05	NEUROTRANSMITTER RELATED	2.35%	Adrenergic, Alpha 1, Non-selective	4.57E-9	Phentolamine	[3H]7-MeOxy-Prazosin
16	1.0E-05	NEUROTRANSMITTER RELATED	0.15%	Adrenergic, Alpha 2, Non-selective	3.22E-9	Phentolamine	[3H]RX 821002
16	1.0E-05	NEUROTRANSMITTER RELATED	5.52%	Adrenergic, Beta, Non-selective	3.44E-9	Alprenolol HCl	[3H]DHA
16	1.0E-05	NEUROTRANSMITTER RELATED	-11.83%	Dopamine Transporter	1.87E-8	GBR12909	[3H]WIN 35,428
16	1.0E-05	NEUROTRANSMITTER RELATED	-6.98%	Dopamine, Non-selective	1.06E-9	Spiperone HCl	[3H]Spiperone
16	1.0E-05	NEUROTRANSMITTER RELATED	3.79%	GABA A, Agonist Site	2.95E-8	GABA	[3H]GABA
16	1.0E-05	NEUROTRANSMITTER RELATED	-16.67%	GABA A, BDZ, alpha 1 site	1.21E-9	Ro15-1788 (Flumazenil)	[3H]Flunitrazepam
16	1.0E-05	NEUROTRANSMITTER RELATED	10.34%	GABA-B	7.82E-7	(+/-) Baclofen	[3H]CGP 54626A
16	1.0E-05	NEUROTRANSMITTER RELATED	-19.02%	Glutamate, AMPA Site (Ionotropic)	6.66E-8	(+/-) AMPA HBr	[3H]AMPA
16	1.0E-05	NEUROTRANSMITTER RELATED	4.51%	Glutamate, Kainate Site (Ionotropic)	3.97E-9	Kainic Acid	[3H]Kainic acid
16	1.0E-05	NEUROTRANSMITTER RELATED	21.92%	Glutamate, NMDA Agonist Site (Ionotropic)	8.08E-6	NMDA	[3H]CGP 39653
16	1.0E-05	NEUROTRANSMITTER RELATED	-6.59%	Glutamate,NMDA,Glycine (Stry-insens Site) (Ionot	3.10E-8	MDL-105,519	[3H]-MDL-105,519
16	1.0E-05	NEUROTRANSMITTER RELATED	-1.14%	Glycine, Strychnine-sensitive	2.40E-8	Strychnine nitrate	[3H]Strychnine
16	1.0E-05	NEUROTRANSMITTER RELATED	8.28%	Histamine, H1	3.23E-9	Triprolidine	[3H]Pyrilamine
16	1.0E-05	NEUROTRANSMITTER RELATED	7.11%	Histamine, H2	1.47E-8	Tiotidine	[125I]-Aminopotentidine
16	1.0E-05	NEUROTRANSMITTER RELATED	11.53%	Histamine, H3	1.12E-9	N-a-Methylhistamine (NAMH	[3H]N-a-MeHistamine
16	1.0E-05	NEUROTRANSMITTER RELATED	1.72%	Melatonin, Non-selective	7.22E-10	Melatonin	[125I]-2-Iodomelatonin
16	1.0E-05	NEUROTRANSMITTER RELATED	11.12%	Muscarinic, M1 (hr)	4.69E-11	(-)Scopolamine, MeBr	[3H]Scopolamine, N-Methyl
16	1.0E-05	NEUROTRANSMITTER RELATED	19.74%	Muscarinic, M2 (h)	3.17E-10	(-)Scopolamine, MeBr	[3H]Scopolamine, N-Methyl
16	1.0E-05	NEUROTRANSMITTER RELATED	5.74%	Muscarinic, Non-selective, Central	1.21E-10	Atropine sulfate	[3H]QNB
16	1.0E-05	NEUROTRANSMITTER RELATED	9.13%	Muscarinic, Non-selective, Peripheral	2.49E-10	Atropine sulfate	[3H]QNB
16	1.0E-05	NEUROTRANSMITTER RELATED	98.54%	Nicotinic, Neuronal (a-BnTx insensitive)	5.85E-11	(+/-) Epibatidine	[3H]Epibatidine
16	1.0E-05	NEUROTRANSMITTER RELATED	-6.77%	Norepinephrine Transporter	8.05E-9	Desipramine HCl (DMI)	[3H]Nisoxetine
16	1.0E-05	NEUROTRANSMITTER RELATED	6.51%	Opioid, Non-selective	2.82E-9	Naloxone HCl	[3H]Naloxone
16	1.0E-05	NEUROTRANSMITTER RELATED	7.06%	Opioid, Orphanin, ORL1 (h)	4.22E-10	Nociceptin	[3H] Nociceptin
16	1.0E-05	NEUROTRANSMITTER RELATED	15.27%	Serotonin Transporter	1.48E-8	Imipramine HCl	[3H]Citalopram, N-Methyl
16	1.0E-05	NEUROTRANSMITTER RELATED	92.33%	Serotonin, 5HT3	8.10E-9	MDL 72222	[3H]GR 65630
16	1.0E-05	NEUROTRANSMITTER RELATED	98.60%	Serotonin, 5HT3 (h)	5.60E-9	MDL-72222	[3H]-GR65630
16	1.0E-05	NEUROTRANSMITTER RELATED	4.17%	Serotonin, Non-selective	1.16E-8	Methysergide maleate	[3H] LSD
16	1.0E-05	NEUROTRANSMITTER RELATED	12.01%	Sigma, Non-selective	4.93E-9	Haloperidol	[3H]DTG
16	1.0E-05	STEROIDS	22.77%	Estrogen	3.89E-10	17-B-Estradiol	[3H] Estradiol
16	1.0E-05	STEROIDS	-6.02%	Testosterone (cytosolic) (h)	5.94E-10	Methyltrienolone	3H-Methyltrienolone
16	1.0E-05	ION CHANNELS	11.28%	Calcium Channel, Type L (Dihydropyridine Site)	8.66E-10	Nifedipine	[3H]Nitrendipine
16	1.0E-05	ION CHANNELS	8.95%	Calcium Channel, Type N	2.86E-11	w-Conotoxin GVIA	[125I]-Conotoxin GVIA
16	1.0E-05	ION CHANNELS	5.95%	Potassium Channel, ATP-Sensitive	3.28E-10	Glibenclamide	[3H]Glibenclamide
16	1.0E-05	ION CHANNELS	3.22%	Potassium Channel, Ca2+ Act., VI	2.52E-11	Apamin	[125I]Apamin
16	1.0E-05	ION CHANNELS	-2.29%	Potassium Channel, I[Kr] (hERG) (h)	1.85E-6	Terfenadine	[3H]Astemizole
16	1.0E-05	ION CHANNELS	2.24%	Sodium, Site 2	6.37E-7	Aconitine	[3H]Batrachotoxin A 20-a-Benzo
16	1.0E-05	SECOND MESSENGERS	-2.86%	Nitric Oxide, NOS (Neuronal-Binding)	1.10E-8	NOARG (Nitro-L-Arginine)	[3H]NOARG
16	1.0E-05	PROSTAGLANDINS	-17.35%	Leukotriene, LTB4 (BLT)	1.10E-9	LTB4	[3H]LTB4
16	1.0E-05	PROSTAGLANDINS	12.73%	Leukotriene, LTD4 (CysLT1)	1.95E-9	LTD4	[3H]LTD4
16	1.0E-05	PROSTAGLANDINS	-11.85%	Thromboxane A2 (h)	3.52E-8	Pinane-thromboxane A2	[3H]SQ 29,548
16	1.0E-05	GROWTH FACTORS/HORMONES	0.02%	Corticotropin Releasing Factor, Non-selective	9.97E-9	Tyr0-oCRF	[125I]Tyr0-oCRF
16	1.0E-05	GROWTH FACTORS/HORMONES	5.58%	Oxytocin	1.62E-9	Oxytocin	[3H]Oxytocin
16	1.0E-05	GROWTH FACTORS/HORMONES	16.17%	Platelet Activating Factor, PAF	4.40E-9	C16-PAF	Hexadecyl-[3H]-acetyl-PAF
16	1.0E-05	GROWTH FACTORS/HORMONES	10.21%	Thyrotropin Releasing Hormone, TRH	5.45E-8	TRH	[3H]-(3MeHis2)TRH
16	1.0E-05	BRAIN/GUT PEPTIDES	-6.46%	Angiotensin II, AT1 (h)	7.82E-9	Angiotensin II (Human)	[125I]-(Sar1-Ile8) Angiotensin
16	1.0E-05	BRAIN/GUT PEPTIDES	4.95%	Angiotensin II, AT2	6.23E-10	Angiotensin II (Human)	[125I]Tyr4-Angiotensin II
16	1.0E-05	BRAIN/GUT PEPTIDES	3.84%	Bradykinin, BK2	1.73E-10	Bradykinin TFA Salt	[3H]Bradykinin
16	1.0E-05	BRAIN/GUT PEPTIDES	15.60%	Cholecystokinin, CCK1 (CCKA)	5.49E-11	CCK-8 (sulfated)	[125I]CCK-8
16	1.0E-05	BRAIN/GUT PEPTIDES	10.84%	Cholecystokinin, CCK2 (CCKB)	4.93E-10	CCK-8 (sulfated)	[125I]CCK-8
16	1.0E-05	BRAIN/GUT PEPTIDES	5.38%	Endothelin, ET-A (h)	1.86E-10	Endothelin-1	[125I] Endothelin-1
16	1.0E-05	BRAIN/GUT PEPTIDES	-3.91%	Endothelin, ET-B (h)	4.91E-10	Endothelin-1	[125I]-Endothelin-1
16	1.0E-05	BRAIN/GUT PEPTIDES	9.89%	Galanin, Non-Selective	3.15E-10	Galanin (Porcine)	[I125]Galanin
16	1.0E-05	BRAIN/GUT PEPTIDES	15.10%	Neurokinin, NK1	1.99E-9	Substance P	[3H]Substance P
16	1.0E-05	BRAIN/GUT PEPTIDES	4.29%	Neurokinin, NK2 (NKA) (h)	4.66E-10	Neurokinin A	[125I]-NKA
16	1.0E-05	BRAIN/GUT PEPTIDES	-0.40%	Neurokinin, NK3 (NKB)	6.89E-9	Eledoisin	[125I]Eledoisin
16	1.0E-05	BRAIN/GUT PEPTIDES	-8.90%	Vasoactive Intestinal Peptide, Non-selective	8.05E-10	VIP	[125I]VIP
16	1.0E-05	BRAIN/GUT PEPTIDES	-0.49%	Vasopressin 1	1.37E-9	Arg8-Vasopressin (AVP)	[3H]Phenyl 3,4,5- 8-Arg-Vasopr
16	1.0E-05	ENZYMES	-9.65%	Decarboxylase, Glutamic Acid	2.73E-7	AminoOxy acetic acid	[14C]Glutamic acid
16	1.0E-05	ENZYMES	2.71%	Esterase, Acetylcholine	2.34E-6	Eserine (Physostigmine)	Acetylthiocholine
16	1.0E-05	ENZYMES	2.50%	Oxidase, MAO-A, Peripheral	8.50E-9	Ro 41-1049	[14C]-5HT (Serotonin)
16	1.0E-05	ENZYMES	4.13%	Oxidase, MAO-B, Peripheral	5.67E-8	Ro 16-6491 HCl	[14C]Phenylethylamine
16	1.0E-05	ENZYMES	22.76%	Transferase, Choline Acetyl	3.59E-7	Bromoacetylcholine Bromid	[14C]Acetyl Coenzyme
16	1.0E-05	ADME-TOX	19.74%	Metabolism, Cytochrome P450, CYP1A2 (h)	5.22E-7	Furafylline	7-ethoxy-3-cyanocoumarin (CEC)
16	1.0E-05	ADME-TOX	10.43%	Metabolism, Cytochrome P450, CYP2A6 (h)	2.94E-7	Tranylcypromine	Coumarin
16	1.0E-05	ADME-TOX	11.94%	Metabolism, Cytochrome P450, CYP2C19 (h)	6.37E-6	Tranylcypromine	7-ethoxy-3-cyanocoumarin (CEC)
16	1.0E-05	ADME-TOX	9.30%	Metabolism, Cytochrome P450, CYP2C9*1 (h)	2.64E-7	Sulfaphenazone	MFC (7-MeOxy-4-trifluoroMe cou
16	1.0E-05	ADME-TOX	7.97%	Metabolism, Cytochrome P450, CYP2D6 (h)	1.58E-8	Quinidine	AMMC
16	1.0E-05	ADME-TOX	3.90%	Metabolism, Cytochrome P450, CYP3A4 (h)	4.57E-8	Ket	DBF

## Sheet: OTHR10
S1. Percent Inhibition data of compound 16 with targets grouped by protein family
NEUROTRANSMITTER RELATED
Compound Number	Compound Concentration(nM)	Percent Inhibition	Assay Name	Reference Ki(nM)	Reference Compound	Radioligand
16	10000	14.60%	Adenosine, Non-selective	8.17E-9	Neca	[3H]NECA
16	10000	2.35%	Adrenergic, Alpha 1, Non-selective	4.57E-9	Phentolamine	[3H]7-MeOxy-Prazosin
16	10000	0.15%	Adrenergic, Alpha 2, Non-selective	3.22E-9	Phentolamine	[3H]RX 821002
16	10000	5.52%	Adrenergic, Beta, Non-selective	3.44E-9	Alprenolol HCl	[3H]DHA
16	10000	-11.83%	Dopamine Transporter	1.87E-8	GBR12909	[3H]WIN 35,428
16	10000	-6.98%	Dopamine, Non-selective	1.06E-9	Spiperone HCl	[3H]Spiperone
16	10000	3.79%	GABA A, Agonist Site	2.95E-8	GABA	[3H]GABA
16	10000	-16.67%	GABA A, BDZ, alpha 1 site	1.21E-9	Ro15-1788 (Flumazenil)	[3H]Flunitrazepam
16	10000	10.34%	GABA-B	7.82E-7	(+/-) Baclofen	[3H]CGP 54626A
16	10000	-19.02%	Glutamate, AMPA Site (Ionotropic)	6.66E-8	(+/-) AMPA HBr	[3H]AMPA
16	10000	4.51%	Glutamate, Kainate Site (Ionotropic)	3.97E-9	Kainic Acid	[3H]Kainic acid
16	10000	21.92%	Glutamate, NMDA Agonist Site (Ionotropic)	8.08E-6	NMDA	[3H]CGP 39653
16	10000	-6.59%	Glutamate,NMDA,Glycine (Stry-insens Site) (Ionot	3.10E-8	MDL-105,519	[3H]-MDL-105,519
16	10000	-1.14%	Glycine, Strychnine-sensitive	2.40E-8	Strychnine nitrate	[3H]Strychnine
16	10000	8.28%	Histamine, H1	3.23E-9	Triprolidine	[3H]Pyrilamine
16	10000	7.11%	Histamine, H2	1.47E-8	Tiotidine	[125I]-Aminopotentidine
16	10000	11.53%	Histamine, H3	1.12E-9	N-a-Methylhistamine (NAMH	[3H]N-a-MeHistamine
16	10000	1.72%	Melatonin, Non-selective	7.22E-10	Melatonin	[125I]-2-Iodomelatonin
16	10000	11.12%	Muscarinic, M1 (hr)	4.69E-11	(-)Scopolamine, MeBr	[3H]Scopolamine, N-Methyl
16	10000	19.74%	Muscarinic, M2 (h)	3.17E-10	(-)Scopolamine, MeBr	[3H]Scopolamine, N-Methyl
16	10000	5.74%	Muscarinic, Non-selective, Central	1.21E-10	Atropine sulfate	[3H]QNB
16	10000	9.13%	Muscarinic, Non-selective, Peripheral	2.49E-10	Atropine sulfate	[3H]QNB
16	10000	98.54%	Nicotinic, Neuronal (a-BnTx insensitive)	5.85E-11	(+/-) Epibatidine	[3H]Epibatidine
16	10000	-6.77%	Norepinephrine Transporter	8.05E-9	Desipramine HCl (DMI)	[3H]Nisoxetine
16	10000	6.51%	Opioid, Non-selective	2.82E-9	Naloxone HCl	[3H]Naloxone
16	10000	7.06%	Opioid, Orphanin, ORL1 (h)	4.22E-10	Nociceptin	[3H] Nociceptin
16	10000	15.27%	Serotonin Transporter	1.48E-8	Imipramine HCl	[3H]Citalopram, N-Methyl
16	10000	92.33%	Serotonin, 5HT3	8.10E-9	MDL 72222	[3H]GR 65630
16	10000	98.60%	Serotonin, 5HT3 (h)	5.60E-9	MDL-72222	[3H]-GR65630
16	10000	4.17%	Serotonin, Non-selective	1.16E-8	Methysergide maleate	[3H] LSD
16	10000	12.01%	Sigma, Non-selective	4.93E-9	Haloperidol	[3H]DTG
Steroids
Compound Number	Compound Concentration(s)	Percent Inhibition	Assay Name	Reference Ki	Reference Compound	Radioligand
16	10000	22.77%	Estrogen	3.89E-10	17-B-Estradiol	[3H] Estradiol
16	10000	-6.02%	Testosterone (cytosolic) (h)	5.94E-10	Methyltrienolone	3H-Methyltrienolone
ION CHANNELS
Compound Number	Compound Concentration(s)	Percent Inhibition	Assay Name	Reference Ki	Reference Compound	Radioligand
16	10000	11.28%	Calcium Channel, Type L (Dihydropyridine Site)	8.66E-10	Nifedipine	[3H]Nitrendipine
16	10000	8.95%	Calcium Channel, Type N	2.86E-11	w-Conotoxin GVIA	[125I]-Conotoxin GVIA
16	10000	5.95%	Potassium Channel, ATP-Sensitive	3.28E-10	Glibenclamide	[3H]Glibenclamide
16	10000	3.22%	Potassium Channel, Ca2+ Act., VI	2.52E-11	Apamin	[125I]Apamin
16	10000	-2.29%	Potassium Channel, I[Kr] (hERG) (h)	1.85E-6	Terfenadine	[3H]Astemizole
16	10000	2.24%	Sodium, Site 2	6.37E-7	Aconitine	[3H]Batrachotoxin A 20-a-Benzo
SECOND MESSENGERS
Compound Number	Compound Concentration(s)	Percent Inhibition	Assay Name	Reference Ki	Reference Compound	Radioligand
16	10000	-2.86%	Nitric Oxide, NOS (Neuronal-Binding)	1.10E-8	NOARG (Nitro-L-Arginine)	[3H]NOARG
PROSTAGLANDINS
Compound Number	Compound Concentration(s)	Percent Inhibition	Assay Name	Reference Ki	Reference Compound	Radioligand
16	10000	-17.35%	Leukotriene, LTB4 (BLT)	1.10E-9	LTB4	[3H]LTB4
16	10000	12.73%	Leukotriene, LTD4 (CysLT1)	1.95E-9	LTD4	[3H]LTD4
16	10000	-11.85%	Thromboxane A2 (h)	3.52E-8	Pinane-thromboxane A2	[3H]SQ 29,548
GROWTH FACTORS/HORMONES
Compound Number	Compound Concentration(s)	Percent Inhibition	Assay Name	Reference Ki	Reference Compound	Radioligand
16	10000	0.02%	Corticotropin Releasing Factor, Non-selective	9.97E-9	Tyr0-oCRF	[125I]Tyr0-oCRF
16	10000	5.58%	Oxytocin	1.62E-9	Oxytocin	[3H]Oxytocin
16	10000	16.17%	Platelet Activating Factor, PAF	4.40E-9	C16-PAF	Hexadecyl-[3H]-acetyl-PAF
16	10000	10.21%	Thyrotropin Releasing Hormone, TRH	5.45E-8	TRH	[3H]-(3MeHis2)TRH
BRAIN/GUT PEPTIDES
Compound Number	Compound Concentration(s)	Percent Inhibition	Assay Name	Reference Ki	Reference Compound	Radioligand
16	10000	-6.46%	Angiotensin II, AT1 (h)	7.82E-9	Angiotensin II (Human)	[125I]-(Sar1-Ile8) Angiotensin
16	10000	4.95%	Angiotensin II, AT2	6.23E-10	Angiotensin II (Human)	[125I]Tyr4-Angiotensin II
16	10000	3.84%	Bradykinin, BK2	1.73E-10	Bradykinin TFA Salt	[3H]Bradykinin
16	10000	15.60%	Cholecystokinin, CCK1 (CCKA)	5.49E-11	CCK-8 (sulfated)	[125I]CCK-8
16	10000	10.84%	Cholecystokinin, CCK2 (CCKB)	4.93E-10	CCK-8 (sulfated)	[125I]CCK-8
16	10000	5.38%	Endothelin, ET-A (h)	1.86E-10	Endothelin-1	[125I] Endothelin-1
16	10000	-3.91%	Endothelin, ET-B (h)	4.91E-10	Endothelin-1	[125I]-Endothelin-1
16	10000	9.89%	Galanin, Non-Selective	3.15E-10	Galanin (Porcine)	[I125]Galanin
16	10000	15.10%	Neurokinin, NK1	1.99E-9	Substance P	[3H]Substance P
16	10000	4.29%	Neurokinin, NK2 (NKA) (h)	4.66E-10	Neurokinin A	[125I]-NKA
16	10000	-0.40%	Neurokinin, NK3 (NKB)	6.89E-9	Eledoisin	[125I]Eledoisin
16	10000	-8.90%	Vasoactive Intestinal Peptide, Non-selective	8.05E-10	VIP	[125I]VIP
16	10000	-0.49%	Vasopressin 1	1.37E-9	Arg8-Vasopressin (AVP)	[3H]Phenyl 3,4,5- 8-Arg-Vasopr
ENZYMES
Compound Number	Compound Concentration(nM)	Percent Inhibition	Assay Name	Reference Ki(nM)	Reference Compound	Radioligand
16	10000	-9.65%	Decarboxylase, Glutamic Acid	2.73E-7	AminoOxy acetic acid	[14C]Glutamic acid
16	10000	2.71%	Esterase, Acetylcholine	2.34E-6	Eserine (Physostigmine)	Acetylthiocholine
16	10000	2.50%	Oxidase, MAO-A, Peripheral	8.50E-9	Ro 41-1049	[14C]-5HT (Serotonin)
16	10000	4.13%	Oxidase, MAO-B, Peripheral	5.67E-8	Ro 16-6491 HCl	[14C]Phenylethylamine
16	10000	22.76%	Transferase, Choline Acetyl	3.59E-7	Bromoacetylcholine Bromid	[14C]Acetyl Coenzyme
ADME-TOX
Compound Number	Compound Concentration(s)	Percent Inhibition	Assay Name	Reference Ki	Reference Compound	Radioligand
16	10000	19.74%	Metabolism, Cytochrome P450, CYP1A2 (h)	5.22E-7	Furafylline	7-ethoxy-3-cyanocoumarin (CEC)
16	10000	10.43%	Metabolism, Cytochrome P450, CYP2A6 (h)	2.94E-7	Tranylcypromine	Coumarin
16	10000	11.94%	Metabolism, Cytochrome P450, CYP2C19 (h)	6.37E-6	Tranylcypromine	7-ethoxy-3-cyanocoumarin (CEC)
16	10000	9.30%	Metabolism, Cytochrome P450, CYP2C9*1 (h)	2.64E-7	Sulfaphenazone	MFC (7-MeOxy-4-trifluoroMe cou
16	10000	7.97%	Metabolism, Cytochrome P450, CYP2D6 (h)	1.58E-8	Quinidine	AMMC
16	10000	3.90%	Metabolism, Cytochrome P450, CYP3A4 (h)	4.57E-8	Ket	DBF
OTHR10 = 3/71*100=4%
where 71 is the total number of assays and 3 is the number of assays where % inhibition is greater than 50%. An OTHR10 = 4% shows that compound 16 is selective.
